# Supplementary material for: DNA Methylation on N6-Adenine Regulates the Hyphal Development during Dimorphism in the Early-Diverging Fungus Mucor lusitanicus
Source: MDPI journal article supplement (doi:10.3390/jof7090738), 2021-09-08
Supplement: s1 [file s1]

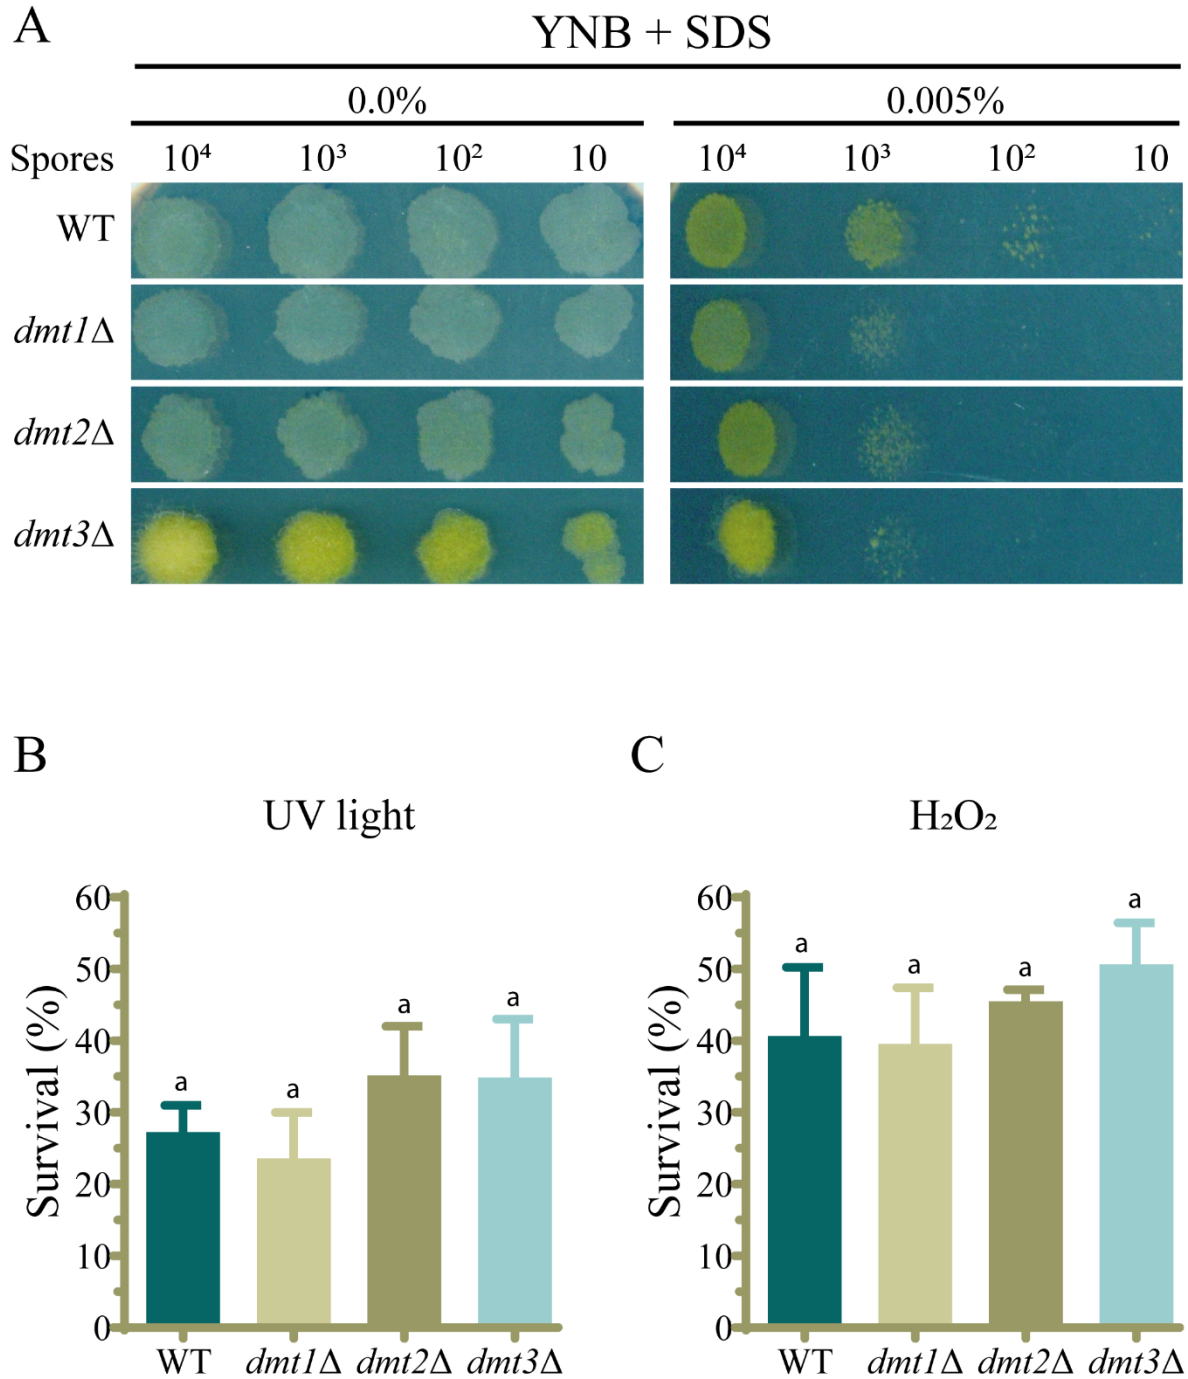

**Figure S6.** Survival analysis of single deletion mutants in the *dmt1*, *dmt2*, and *dmt3* genes exposed to stress generating compounds and DNA damaging agents. A) Different amounts of fresh spores *dmt* knockout mutants and the wild type strain MU636 (WT) were spotted on YNB agar plates, pH 3, amended with 0.005% SDS, and grown for 48 h at 26°C. B y C) For UV-associated assays and Hydrogen peroxide (H<sub>2</sub>O<sub>2</sub>), 200 spores were seeded on YNB plates, pH 3, supplemented with exposed to 10 mJ/cm<sup>2</sup> UV, or 5 mM H<sub>2</sub>O<sub>2</sub>, respectively. All the cultures were incubated for 48 h at 26°C, and the ability to develop colonies and the survival percentage were determined. The graphs display means ± SD. Three independent experiments were conducted. The statical analysis was performed using ANOVA ( $P < 0.001$ , Tukey test) and the identical letters mean not significant differences.
