# Supplementary material for: DNA Methylation on N6-Adenine Regulates the Hyphal Development during Dimorphism in the Early-Diverging Fungus Mucor lusitanicus
Source: MDPI journal article supplement (doi:10.3390/jof7090738), 2021-09-08
Supplement: s1 [file s1]

A

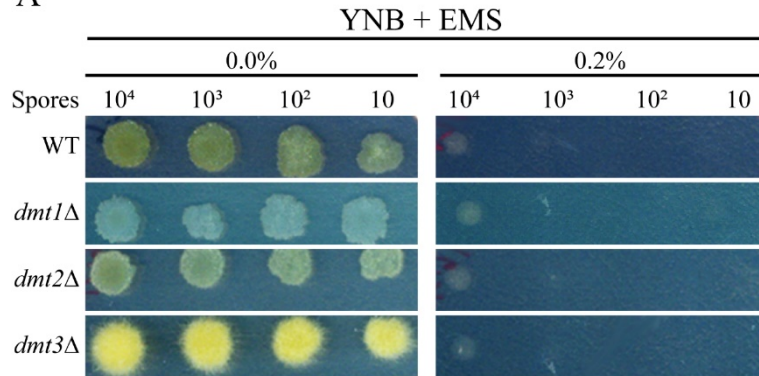

B

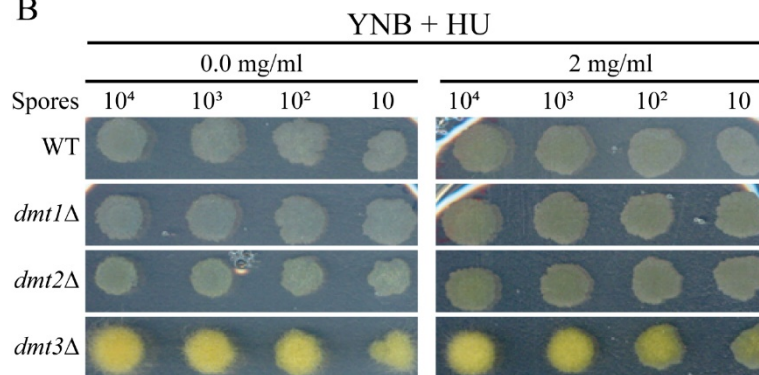

**Figure S5.** Phenotypic analysis of single deletion mutants in the *dmt1*, *dmt2*, and *dmt3* genes exposed to alkylating agents and compounds inhibiting DNA synthesis. The indicated amount of fresh spores of wild-type strain MU636 (WT) and *dmt* mutants were spotted on YNB agar plates, pH 3, amended with 0.2% EMS (A) or 2 mg/ml HU (B), and grown for 48 h at 26°C. Three independent experiments were conducted for each strain.
