# Supplementary material for: DNA Methylation on N6-Adenine Regulates the Hyphal Development during Dimorphism in the Early-Diverging Fungus Mucor lusitanicus
Source: MDPI journal article supplement (doi:10.3390/jof7090738), 2021-09-08
Supplement: s1 [file s1]

Supplementary Table S1. Mutants generated in this study

| <b>Name</b> | <b>Genotype</b>                                                                                                 |
|-------------|-----------------------------------------------------------------------------------------------------------------|
| MU1316      | <i>dmt1</i> Δ:: <i>pyrG</i> <sup>+</sup> , <i>leuA</i> <sup>-</sup>                                             |
| MU1317      | <i>dmt1</i> Δ:: <i>pyrG</i> <sup>+</sup> , <i>leuA</i> <sup>-</sup>                                             |
| MU1318      | <i>dmt2</i> Δ:: <i>pyrG</i> <sup>+</sup> , <i>leuA</i> <sup>-</sup>                                             |
| MU1319      | <i>dm2</i> Δ:: <i>pyrG</i> <sup>+</sup> , <i>leuA</i> <sup>-</sup>                                              |
| MU1320      | <i>dmt3</i> Δ:: <i>pyrG</i> <sup>+</sup> , <i>leuA</i> <sup>-</sup>                                             |
| MU1321      | <i>dmt3</i> Δ:: <i>pyrG</i> <sup>+</sup> , <i>leuA</i> <sup>-</sup>                                             |
| MU1322      | <i>dmt1</i> Δ:: <i>pyrG</i> <sup>+</sup> , <i>dmt3</i> Δ:: <i>leuA</i> <sup>+</sup>                             |
| MU1324      | <i>dmt1</i> Δ:: <i>pyrG</i> <sup>+</sup> , <i>dmt3</i> Δ:: <i>leuA</i> <sup>+</sup>                             |
| MU1325      | <i>dmt1</i> Δ:: <i>pyrG</i> <sup>+</sup> , <i>dmt2</i> Δ:: <i>leuA</i> <sup>+</sup>                             |
| MU1326      | <i>dmt1</i> Δ:: <i>pyrG</i> <sup>+</sup> , <i>dmt2</i> Δ:: <i>leuA</i> <sup>+</sup>                             |
| MU1328      | <i>dmt2</i> Δ:: <i>pyrG</i> <sup>+</sup> , <i>dmt3</i> Δ:: <i>leuA</i> <sup>+</sup>                             |
| MU1330      | <i>dmt2</i> Δ:: <i>pyrG</i> <sup>+</sup> , <i>dmt3</i> Δ:: <i>leuA</i> <sup>+</sup>                             |
| MU1331      | <i>dmt1</i> Δ:: <i>pyrG</i> <sup>+</sup> , <i>carRP</i> Δ:: <i>leuA</i> <sup>+</sup> , <i>dmt1</i> <sup>+</sup> |
| MU1334      | <i>dmt1</i> Δ:: <i>pyrG</i> <sup>+</sup> , <i>carRP</i> Δ:: <i>leuA</i> <sup>+</sup>                            |
