# Supplementary material for: DNA Methylation on N6-Adenine Regulates the Hyphal Development during Dimorphism in the Early-Diverging Fungus Mucor lusitanicus
Source: MDPI journal article supplement (doi:10.3390/jof7090738), 2021-09-08
Supplement: s1 [file s1]

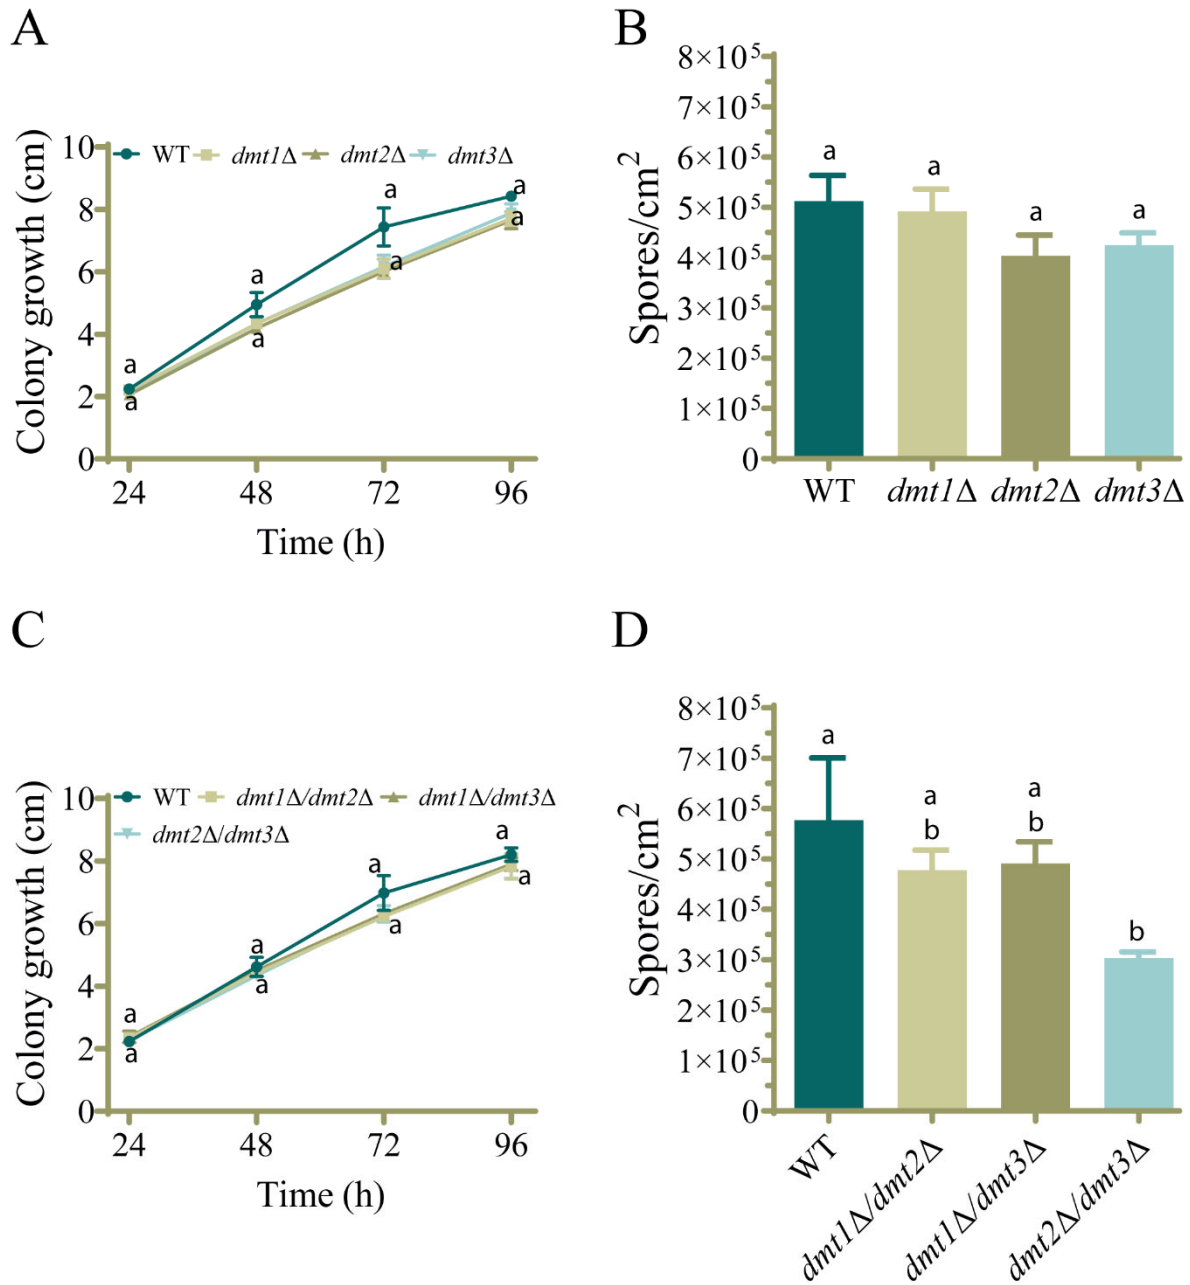

**Figure S4.** Single and double deletion mutants in the *dmt* genes are not affected in the growth and sporulation. A and C) A drop containing 500 spores of the wild-type (WT), *dmt1Δ* (MU1317), *dmt2Δ* (MU1318), *dmt3Δ* (MU1320), *dmt1Δ/dmt2Δ* (MU1326), *dmt1Δ/dmt3Δ* (MU1326), and *dmt2Δ/dmt3Δ* (MU1330) strains were inoculated on the centre of YPG medium plates and the diameter was measured every 24 h. B and D) Spore production of each strain cultured on solid YPG medium, pH 4.5, was determined by counting the spore number harvested 96 h of growth in 12 h light/dark cycles at 26°C. The graphs display means ± SD. Three independent experiments were conducted for each strain. The wild-type strains are MU636 (A and B) and CBS277.49 (C and D). The statistical analysis was performed using ANOVA ( $P < 0.001$ , Tukey test) and the identical letters mean not significant differences.
