# Supplementary material for: DNA Methylation on N6-Adenine Regulates the Hyphal Development during Dimorphism in the Early-Diverging Fungus Mucor lusitanicus
Source: MDPI journal article supplement (doi:10.3390/jof7090738), 2021-09-08
Supplement: s1 [file s1]

Supplementary Table S2. Primers used in this work.

| Primer name    | Sequence (5'-3') <sup>a, b</sup>                       | Experiment                                        |
|----------------|--------------------------------------------------------|---------------------------------------------------|
| leuAF          | TGCTCCCTACCAACTCTATTC                                  | Selective marker amplification,<br>PCR validation |
| leuAR          | GTCGAGTTGACCAGAATGTAC                                  | Selective marker amplification                    |
| dmt2-F5'       | GCCTGCACGGTATACTGACG                                   | <i>dmt2</i> deletion construct                    |
| dmt2-R5'+ leuA | <u>GAATAGAGTTGGTAGGGAGCATCAAGAAGGTGGAGGAGAAACA</u>     | <i>dmt2</i> deletion construct                    |
| dmt2-F3'+ leuA | <u>GTACATTCTGGTCAACTCGACAGCATAGTAAAAGATAGATGGAGCGT</u> | <i>dmt2</i> deletion construct                    |
| dmt2-R3'       | CACGCGGAATCTGAATGACG                                   | <i>dmt2</i> deletion construct                    |
| dmt3-F5        | CGGTTGCCCTTTCTTTCTCG                                   | <i>dmt3</i> deletion construct                    |
| dmt3-R5+leuA   | <u>GAATAGAGTTGGTAGGGAGCATCTCTTTGTGATGAAGGTTGGA</u>     | <i>dmt3</i> deletion construct                    |
| dmt3-F3+leuA   | <u>GTACATTCTGGTCAACTCGACAGCCATTTTGTGATTTGAGGT</u>      | <i>dmt3</i> deletion construct                    |
| dmt3-R3        | GTCCCGGTAAGTACAACGCA                                   | <i>dmt3</i> deletion construct                    |
| pkaR4-TR-F     | AGTCTGGCCTTGCCGTGTTT                                   | RT-qPCR                                           |
| pkaR4-TR-R     | GCAACGACCGTAGCTGCTCT                                   | RT-qPCR                                           |
| dmt1-F+ XhoI   | TCCCTCGAGAGGTCCCCCTTGACACGTGGTTC                       | <i>dmt1</i> ORF                                   |
| dmt1-R+ SacII  | TCACCGCGGAGTGCACCATGGATTCTTGTC                         | <i>dmt1</i> ORF                                   |
| P1             | GAAAGCCTGCATTGGATTGGC                                  | <i>dmt2</i> replacement confirmation              |
| P2             | CGAAAAGTGCCCTATCGG                                     | <i>dmt2</i> replacement confirmation              |
| P3             | GTACACTGTTGCTCTCCATGTG                                 | <i>dmt3</i> replacement confirmation              |
| P4             | AGCAAATCGTCGTGGATGGT                                   | <i>dmt3</i> replacement confirmation              |
| pyrGF          | TGCCTCAGCATTTGGTACTTG                                  | Selective marker amplification                    |
| pyrGR          | GTACACTGGCCATGCTATCG                                   | Selective marker amplification                    |
| 85076 F        | ACAATCTCGGCCTCGGAACAAGTGC                              | <i>dmt1</i> deletion construct                    |
| 85076 RpyrG    | <u>CAAGTACCAATGCTGAGGCATGCACCTTGCTGTCATGGCAACAAGC</u>  | <i>dmt1</i> deletion construct                    |
| 85076 FpyrG    | <u>CGATAGCATGGCCAGTGTA</u> CGCTTGACCAATGGATACCTACTGAC  | <i>dmt1</i> deletion construct                    |
| 85076 R        | ATCCCCCTTGACACGTGGTTCGTAGC                             | <i>dmt1</i> deletion construct                    |
| 115786 F       | CTCCATGCTGATATCTGTACGCTGT                              | <i>dmt3</i> deletion construct                    |
| 115786 RpyrG   | <u>CAAGTACCAATGCTGAGGCATGAGGTT</u> CAGCTGTGATTGGCTCCA  | <i>dmt3</i> deletion construct                    |
| 115786 FpyrG   | <u>CGATAGCATGGCCAGTGTA</u> CTGCTGCTGGTGATTGACAGTTGCTG  | <i>dmt3</i> deletion construct                    |
| 115786 R       | GATGGCTACTGACAAGATCGTTGCTG                             | <i>dmt3</i> deletion construct                    |
| 106998 F       | AGAGCACGCGGAATCTGAATGACG                               | <i>dmt2</i> deletion construct                    |
| 106998 RpyrG   | <u>CAAGTACCAATGCTGAGGCAGTCTATCCACGACATCAGAGCGAGGA</u>  | <i>dmt2</i> deletion construct                    |
| 106998 FpyrG   | <u>CGATAGCATGGCCAGTGTA</u> CCGAAAATAGTGTGCGCCAGCAGGATG | <i>dmt2</i> deletion construct                    |

|             |                                                |                                |
|-------------|------------------------------------------------|--------------------------------|
| 106998 R    | CTTGTGGACATGGAAGATGCTGCT                       | <i>dmt2</i> deletion construct |
| CarRP11     | CATACAAAGCACGAGTTTCC                           | PCR validation                 |
| dmt1-TR-F   | TGCCTCGTAAACCAACCACT                           | PCR validation                 |
| qPCR-EF1-F  | GTCCGTGATATGCGTCAAACC                          | RT-qPCR                        |
| qPCR-EF1-R  | AGCGGCCTTGGTGACCTTAC                           | RT-qPCR                        |
| Udmt1F      | ACAATCTCGGCCTCGGAACAAGTGC                      | Southern blot validation       |
| Ddmt1-pyrGR | CAAGTACCAATGCTGAGGCATGCACCTTGCTGTCATGGCAACAAGC | Southern blot validation       |
| Udmt2F      | AGAGCACGCGGAATCTGAATGACG                       | Southern blot validation       |
| Udmt2-pyrGR | CAAGTACCAATGCTGAGGCAGTCTATCCACGACATCAGAGCGAGGA | Southern blot validation       |
| Udmt3F      | CTCCATGCTGATATCTGTACGCTGT                      | Southern blot validation       |
| Ddmt3-pyrGR | CAAGTACCAATGCTGAGGCATGAGGTTGAGCTGTGATTGGCTCCA  | Southern blot validation       |

<sup>a</sup> Underlined sequences are complementary to selection marker *pyrG* or *leuA*

<sup>b</sup> Bold bases corresponding to the cutting sites to restriction enzymes
